# 1 Respiration, heartbeat, and conscious tactile 2 perception

3 Abbreviated title: Respiration, heartbeat, and tactile perception

4 Martin Grund<sup>1</sup>, Esra Al<sup>1,2</sup>, Marc Pabst<sup>1</sup>, Alice Dabbagh<sup>1,3</sup>, Tilman Stephani<sup>1,4</sup>, Till  
5 Nierhaus<sup>1,5</sup>, and Arno Villringer<sup>1,2</sup>

6 <sup>1</sup>Department of Neurology, Max Planck Institute for Human Cognitive and Brain Sciences, 04103  
7 Leipzig, Germany

8 <sup>2</sup>MindBrainBody Institute, Berlin School of Mind and Brain, Charité – Universitätsmedizin Berlin and  
9 Humboldt-Universität zu Berlin, 10099 Berlin, Germany

10 <sup>3</sup>Pain Perception Group, Max Planck Institute for Human Cognitive and Brain Sciences, 04103  
11 Leipzig, Germany

12 <sup>4</sup>International Max Planck Research School NeuroCom, 04103 Leipzig, Germany

13 <sup>5</sup>Neurocomputation and Neuroimaging Unit, Department of Education and Psychology, Freie  
14 Universität Berlin, 14195 Berlin, Germany

15

16 **Corresponding author:** Martin Grund, Max Planck Institute for Human Cognitive and Brain Sciences,  
17 Stephanstr. 1A, 04103 Leipzig, Germany (mgrund@cbs.mpg.de)

18

19 **Number of pages:** 43

20 **Number of figures:** 7

21 **Number of words for** *Abstract*: 243; *Introduction*: 649; *Discussion*: 1375

22 **Conflict of Interest:** The authors declare no competing financial interest.

23 **Acknowledgements:** The research was funded by the Max Planck Society. We thank Sylvia Stash for  
24 her data acquisition support; Mina Jamshidi Idaji for data analysis advice; and Heike Schmidt-  
25 Duderstedt for preparing the figures for publication.

## 26 **Abstract**

27 Cardiac activity has been shown to interact with conscious tactile perception:  
28 Detecting near-threshold tactile stimuli is more likely during diastole than systole and  
29 heart slowing is more pronounced for detected compared to undetected stimuli.  
30 Here, we investigated how cardiac cycle effects on conscious tactile perception relate  
31 to respiration given the natural coupling of these two dominant body rhythms. Forty-  
32 one healthy participants had to report conscious perception of weak electrical pulses  
33 applied to the left index finger (yes/no) and confidence about their yes/no-decision  
34 (unconfident/confident) while electrocardiography (ECG), respiratory activity (chest  
35 circumference), and finger pulse oximetry were recorded. We confirmed the previous  
36 findings of higher tactile detection rate during diastole and unimodal distribution of  
37 hits in diastole, more specifically, we found this only when participants were confident  
38 about their detection decision. Lowest tactile detection rate occurred 250-300 ms  
39 after the R-peak corresponding to pulse-wave onsets in the finger. Inspiration was  
40 locked to tactile stimulation, and this was more consistent in hits than misses.  
41 Respiratory cycles accompanying misses were longer as compared to hits and  
42 correct rejections. Cardiac cycle effects on conscious tactile perception interact with  
43 decision confidence and coincide with pulse-wave arrival, which suggests the  
44 involvement of higher cognitive processing in this phenomenon possibly related to  
45 predictive coding. The more consistent phase-locking of inspiration with stimulus  
46 onsets for hits than misses is in line with previous reports of phase-locked inspiration

47 to cognitive task onsets which were interpreted as tuning the sensory system for  
48 incoming information.

49

50 **Keywords:** respiration, cardiac cycle, interoception, tactile perception,  
51 electrocardiogram, pulse oximetry

## 52 **Significance statement**

53 Mechanistic studies on perception and cognition tend to focus on the brain neglecting  
54 contributions of the body. Here, we investigated how respiration and heartbeat  
55 influence tactile perception: We show that inspiration locked to expected stimulus  
56 onsets optimizes detection task performance and that tactile detection varies across  
57 the heart cycle with a minimum 250-300 milliseconds after heart contraction, when  
58 the pulse reaches the finger. Lower detection was associated with reduced  
59 confidence ratings, indicating – together with our previous finding of unchanged early  
60 ERPs - that this effect is not a peripheral physiological artifact but a result of higher  
61 cognitive processes that model the internal state of our body, make predictions to  
62 guide behavior, and might also tune respiration to serve the task.

## 63 **Introduction**

64 Our body senses signals from the outer world (exteroception), but also visceral  
65 signals from inside the body (interoception) and it has been shown that these two  
66 continuous types of perception interact (Critchley and Harrison, 2013; Critchley and  
67 Garfinkel, 2015; Babo-Rebelo et al., 2016; Azzalini et al., 2019). For example, we have  
68 recently shown that tactile perception interacts with cardiac activity as conscious  
69 detection of near-threshold stimuli was more likely towards the end of the cardiac  
70 cycle (Motyka et al., 2019; Al et al., 2020) and was followed by a more pronounced  
71 deceleration of heart rate as compared to missed stimuli (Motyka et al., 2019). In line  
72 with increased detection during later cardiac phases (diastole), late (P300) cortical  
73 somatosensory evoked potentials (SEPs) were also higher during diastole as  
74 compared to systole (Al et al., 2020). A similar cardiac phase-dependency has also  
75 been revealed for visual sampling: microsaccades and saccades were more likely  
76 during systole, whereas fixations and blinks during diastole (Ohl et al., 2016; Galvez-  
77 Pol et al., 2020). Following an interoceptive predictive coding account, the very same  
78 brain model that predicts cardiac-associated bodily changes and suppresses their  
79 access to consciousness might suppress perception of external stimuli which  
80 coincide with those changes and modulate the generation of actions (Seth and  
81 Friston, 2016; Kundendorf et al., 2019; Allen et al., 2019). Yet, which bodily changes  
82 are the main driver for the cardiac-related perceptual suppression effect remain to be  
83 determined.

84 Another dominant body rhythm that can even be regulated intentionally in  
85 contrast to cardiac activity is the respiration rhythm (Azzalini et al., 2019). Also for  
86 respiration, which naturally drives and is driven by cardiac activity (Kralemann et al.,

87 2013; Dick et al., 2014), phase-dependency of behavior and perception has been  
88 reported. For instance, self-initiated actions were more likely during expiration,  
89 whereas externally-triggered actions showed no correlation with the respiration  
90 phase (Park et al., 2020). Furthermore, inspiration onsets were reported to lock to  
91 task onsets which resulted in greater task-related brain activity and increased task  
92 performance for visuospatial perception, memory encoding and retrieval, and fearful  
93 face detection (Huijbers et al., 2014; Zelano et al., 2016; Perl et al., 2019). Locked  
94 inspiration was interpreted as tuning the sensory system for upcoming information  
95 (Perl et al., 2019). Thus, inspiration might also be beneficial for conscious perception  
96 and could be timed to paradigms instead of modelled as noise (heartbeat) within an  
97 interoceptive predictive coding framework. While cardiac activity and respiration are  
98 closely interdependent, it remains unclear how they jointly shape perceptual  
99 processes.

100 Our present study combined the observation of cardiac and respiratory activity  
101 with a paradigm that asked participants to report (a) conscious perception of weak  
102 electrical pulses applied to their left index finger and (b) their decision confidence.  
103 Decision confidence was assessed to identify the potential role of metacognition in  
104 cardiac cycle effects. As we have previously shown that greater tactile detection  
105 during diastole corresponded to increased perceptual sensitivity and not to a more  
106 liberal response criterion (Al et al., 2020), we expected the cardiac cycle effect not to  
107 be a side-effect of unconfident perceptual decisions. Recently, afferent fibers in the  
108 finger have been reported to be modulated by cardiac pressure changes which the

109 brain has to ignore or filter out (Macefield, 2003). Thus, we measured pulse oximetry  
110 to investigate whether peripheral physiological changes in the finger caused by the  
111 blood pulse wave coincided with lower tactile detection during systole. Furthermore,  
112 we tried to capture early SEPs at the upper arm to rule out differences in (peripheral)  
113 SEP amplitudes as explanation for altered conscious tactile perception across  
114 cardiac or respiratory cycles.

115 This study setup was intended to address the following research questions:

- 116 - Does the interaction of cardiac activity and conscious tactile perception  
117 depend on decision confidence?
- 118 - How is the relationship between decreased tactile detection and the kinetics  
119 of the pulse wave in the finger?
- 120 - Does conscious tactile perception vary across the respiratory cycle?

## 121 **Methods**

### 122 **Participants**

123 Forty-one healthy humans (21 women, mean age = 25.5, age range: 19-37)  
124 participated in the study. Participants were predominantly right-handed with a mean  
125 laterality index of 90,  $SD = 17$  (Oldfield, 1971). For four participants, the mean laterality  
126 index was not available.

127

### 128 **Ethics statement**

129 All participants provided an informed consent. The experimental procedure and  
130 physiological measurements were approved by the ethics commission at the medical  
131 faculty of the University of Leipzig.

132

### 133 **Experimental design and statistical analysis**

134 The experiment was designed to capture tactile detection of near-threshold stimuli  
135 (50% detection) and trials without stimuli (0% detection) across the cardiac and  
136 respiratory cycle. This resulted in three main stimulus-response conditions: (a) correct  
137 rejections of trials without stimulation, (b) undetected (misses), and (c) detected near-  
138 threshold stimuli (hits). False alarms (yes-responses) during trials without stimulation  
139 were very rare (mean FAR = 6%,  $SD = 6\%$ ) and thus not further analyzed. Additionally,  
140 participants reported their decision confidence which allowed us to split trials by  
141 confidence.

142 We applied circular statistics to investigate whether conscious tactile  
143 perception was uniformly distributed across the cardiac and respiratory cycle or  
144 showed unimodal patterns. For each stimulus onset, the temporal distances to the



145 preceding R-peak and inspiration onset were calculated and put in relation to its  
146 current cardiac and respiratory cycle duration measured in degrees. Following for  
147 each participant, these angles were averaged for hits, misses, and correct rejections.  
148 For each stimulus-response condition, the resulting distributions of mean angles were  
149 tested across participants with the Rayleigh test for uniformity from the R package  
150 “circular” (Version 0.4-93). The application of circular statistics had two advantages:  
151 First, it accounted for cardiac and respiratory cycle duration variance within and  
152 between participants. Second, it allowed us to determine phases when detection  
153 differed without having to rely on arbitrary binning. However, it assumed that the  
154 different phases of the cardiac and respiratory cycle behave proportionally the same  
155 when cycle duration changes. That is why we complemented the circular statistics  
156 with a binning analysis that investigated the near-threshold detection rate for fixed  
157 time intervals relative to the preceding R-peak and inspiration onset.

158 In repeated-measures ANOVAs, Greenhouse-Geisser correction was used to  
159 adjust for the lack of sphericity. Post-hoc *t*-tests *p*-values were corrected for multiple  
160 comparisons with a false discovery rate (FDR) of 5% (Benjamini and Hochberg, 1995).

161

## 162 **Data and code availability**

163 The code to run and analyze the experiment is available at  
164 <http://github.com/grundm/respirationCA>. The behavioral and physiological data  
165 (electrocardiogram, respiration, and oximetry) can be shared by the corresponding  
166 author upon request if data privacy can be guaranteed.

167 **Stimuli and apparatus**

168 Somatosensory stimulation was delivered via steel wire ring electrodes to the left  
169 index finger with a constant current stimulator (DS5; Digitimer, United Kingdom). The  
170 anode was placed on the middle phalanx and the cathode on the proximal phalanx.  
171 The stimuli were single square-wave pulses with a duration of 0.2 ms and an  
172 individually-assessed near-threshold intensity (mean intensity = 1.95 mA, range: 0.76-  
173 3.17 mA). The stimulator was controlled by the waveform generator NI USB-6343  
174 (National Instruments, Austin, Texas) and custom MATLAB scripts using the Data  
175 Acquisition Toolbox (The MathWorks Inc., Natick, Massachusetts, USA).

176

177 **Behavioral paradigm**

178 Participants had to report whether they perceived an electrical pulse and whether this  
179 yes/no-decision was confident or not. The experiment was separated into four  
180 blocks. Each block consisted of 150 trials. Participants received a near-threshold  
181 stimulus in 100 trials (mean intensity = 1.96 mA, range: 0.76-3.22 mA). In 50 trials,  
182 there was no stimulation (33% catch trials). The order of near-threshold and catch  
183 trials was pseudo-randomized for each block and participant. In total, there were 400  
184 near-threshold and 200 catch trials.

185 Each trial started with a black fixation cross (black "+") for a counterbalanced  
186 duration of 1.0-2.0 s (Figure 1). It was followed by a salmon-colored fixation cross  
187 (0.62 s) to cue the stimulation at 0.5 s after the cue onset. With the cue offset, the  
188 participants had to report the detection of a tactile stimulus (yes/no). After the yes/no-  
189 button press, a pause screen was displayed for 0.3 s, before the participants were  
190 asked to report their decision confidence (confident/unconfident). With pressing the

191 button for “confident” or “unconfident”, the new trial started. For both reports, the  
 192 maximum response time was 1.5 s. Thus, the trial duration was limited to 5.8 s.

193 Participants indicated their perception and decision confidence with the right  
 194 index finger on a two-button box. The buttons were arranged vertically. The four  
 195 possible button response mappings were counterbalanced across participants, so  
 196 that the top button could be assigned to “yes” or “no”, and “confident” or  
 197 “unconfident” respectively for one participant.

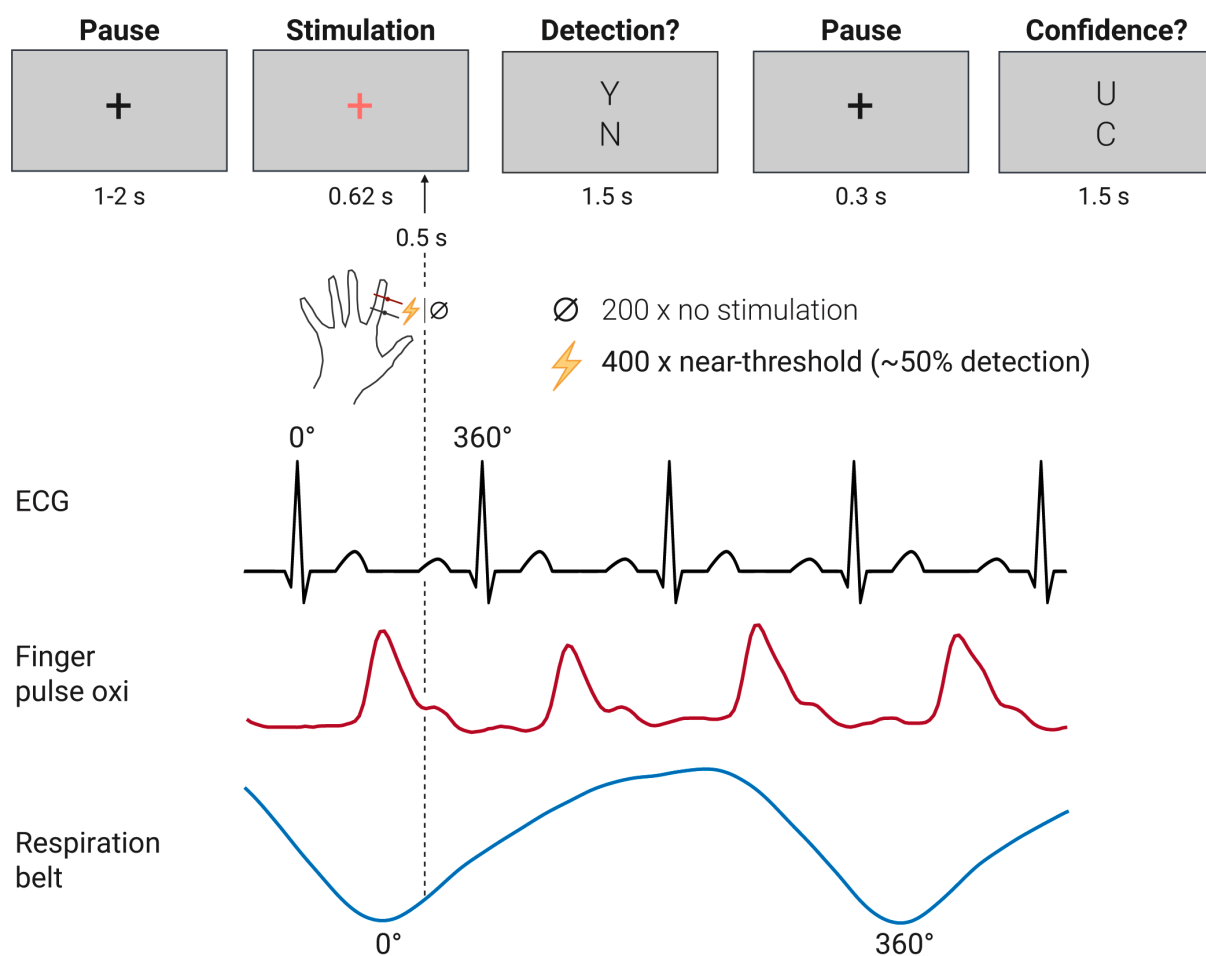

198  
 199 **Figure 1.** Experimental procedure and physiological parameters visualized for one exemplary trial. The  
 200 tiles represent the participant’s visual display and the times given below indicate the presentation  
 201 duration. The near-threshold electrical finger nerve stimulation was always 0.5 s after the cue onset  
 202 (salmon-colored fixation cross). Here only one of four button response mappings is displayed (Y = yes;  
 203 N = no; U = unconfident; C = confident). In total, 400 near-threshold trials and 200 trials without

204 stimulation (33% catch trials) were presented in a randomized order. Exemplary traces of  
205 electrocardiogram (ECG), finger pulse oximetry, and respiration belt below the trial procedure indicate  
206 that stimulus detection was analyzed relative to cardiac and respiratory cycles (0-360°).

207

208         Prior to the experiment, participants were familiarized with the electrical finger  
209 nerve stimulation and an automatic threshold assessment was performed in order to  
210 determine the stimulus intensity corresponding to the sensory threshold (50%  
211 detection rate). The threshold assessment entailed an up-and-down procedure  
212 followed by a Bayesian approach (psi method) from the Palamedes Toolbox  
213 (Kingdom and Prins, 2009) and closed with a test block. The visual display of the trials  
214 in the threshold assessment was similar to the trials in the experimental block (Figure  
215 1) but without the confidence rating and a shorter fixed intertrial interval (0.5 s). If  
216 necessary, the threshold assessment was repeated before each block to ensure a  
217 detection rate of 50% throughout the whole experiment. The experimental procedure  
218 was controlled by custom MATLAB scripts using the Psychophysics Toolbox (Kleiner  
219 et al., 2007).

220

### 221 **Electrocardiogram acquisition**

222 The electrocardiogram (ECG) was recorded with the BrainAmp ExG (Brain Products,  
223 Gilching, Germany) between two adhesive electrodes that were placed on the  
224 sternum and just below the heart on the left side of the thorax. A ground electrode  
225 was placed on the acromion of the right shoulder. The sampling frequency was 5000  
226 Hz for 39 participants. Two participants were recorded with 1000 Hz.

## 227 **Respiration acquisition**

228 Respiration was measured with a respiration belt (BrainAmp ExG; Brain Products,  
229 Gilching, Germany). The belt with a pressure-sensitive cushion was placed at the  
230 largest expansion of the abdomen during inspiration. The sampling frequency was  
231 5000 Hz for 39 participants. Two participants were recorded with 1000 Hz.

232

## 233 **Peripheral nerve activity acquisition**

234 To examine the possibility to measure somatosensory evoked potentials (SEP) of  
235 peripheral nerve activity in response to near-threshold finger stimulation, two surface  
236 electrodes were placed with a distance of 2 cm at the left upper inner arm (below the  
237 biceps brachii) above the pathway of the median nerve in a sub-sample of 12  
238 participants. The signal was recorded with a sampling rate of 5000 Hz, low-pass  
239 filtered at 1000 Hz, using a bipolar electrode montage (BrainAmp ExG; Brain  
240 Products, Gilching, Germany).

241

## 242 **Oximetry acquisition**

243 The pulse oximetry was recorded with a finger clip SpO<sub>2</sub> transducer at the left middle  
244 finger at 50 Hz (OXI100C and MP150; BIOPAC Systems Inc., Goleta, California, USA).

245

## 246 **Behavioral data analysis**

247 The behavioral data was analyzed with R 4.0.3 in RStudio 1.3.10923. First, trials were  
248 filtered for detection and confidence responses within the maximum response time  
249 of 1.5 s. Second, only blocks were considered with a near-threshold hit rate at least  
250 five percentage points above the false alarm rate. These resulted in 37 participants

251 with 4 valid blocks, 2 participants with 3 valid blocks and 2 participants with 2 valid  
252 blocks. The frequencies of the response “confident” for correct rejections, misses,  
253 and hits were compared with paired *t*-tests. Furthermore, the detection and  
254 confidence response times and resulting trial durations were compared between  
255 correct rejections, misses, and hits with paired *t*-tests. The response times for hits  
256 and miss were additionally compared between confident and unconfident near-  
257 threshold trials.

258

### 259 **Cardiac data analysis**

260 ECG data was preprocessed with Kubios (Version 2.2) to detect R-peaks. For two  
261 participants, the first four and the first twenty-two trials respectively had to be  
262 excluded due to a delayed start of the ECG recording. Additionally, one block of one  
263 participant and two blocks of another participant were excluded due to low ECG data  
264 quality.

265 First for correct rejections, misses, and hits, the circular distribution within the  
266 cardiac cycle was assessed with the Rayleigh test of uniformity. Additionally, this  
267 analysis was repeated for confident and unconfident hits and misses.

268 Second, instead of the relative position within the cardiac cycle, near-threshold  
269 trials were assigned to four time intervals based on their temporal distance from the  
270 previous R-peak (0-200 ms, 200-400 ms, 400-600 ms, and 600-900 ms). The last  
271 interval had a duration of 300 ms to account for interindividual differences of the  
272 interbeat interval and aggregate a similar number of trials to the preceding intervals.  
273 Then, detection rates for confident and unconfident decisions were calculated in each

274 time interval and compared with a two-way repeated measures ANOVA and post-hoc  
275 *t*-tests.

276 Third, we analyzed the interbeat intervals in the course of a trial between the  
277 stimulus-response conditions. For this, two interbeat intervals before, one during, and  
278 two after the stimulus onset were selected and compared with a two-way repeated  
279 measures ANOVA and post-hoc *t*-tests.

280

### 281 **Oximetry data analysis**

282 Oximetry data was analyzed with custom MATLAB scripts to detect the pulse wave  
283 peaks with a minimum peak distance based on 140 heartbeats per minute and a  
284 minimum peak prominence equal to a tenth of the data range in each block. Pulse  
285 cycles with a duration 1.5 times the median duration of the respective block were  
286 excluded from further processing. In R, the pulse wave cycle data was merged with  
287 the behavioral data to apply the same exclusion criteria and the Rayleigh test of  
288 uniformity. Finally, pulse wave peaks were located in the cardiac cycle to assess the  
289 duration since the previous R-peak (pulse wave transit time, PWTT) and its relative  
290 position in degree within the cardiac cycle.

291

### 292 **Respiration data analysis**

293 After visual inspection of the respiration traces, respiratory cycle detection was  
294 performed following the procedure by Power et al. (2020). First, outliers were replaced  
295 in a moving 1-s window with linearly interpolated values based on neighboring, non-  
296 outlier values. Local outliers were defined as values of more than three local scaled  
297 median absolute deviations (MAD) away from the local median within a 1-s window

298 (Power et al., 2020). MAD was chosen for its robustness compared to standard  
299 deviation which is more affected by extreme values. Subsequently, the data was  
300 smoothed with a 1-s window Savitzky-Golay filter (Savitzky and Golay, 1964) to  
301 facilitate peak detection. Traces were then z-scored and inverted to identify local  
302 minima (inspiration onsets) with the MATLAB findpeaks function. Local minima had  
303 to be at least 2 s apart with a minimum prominence of 0.9 times the interquartile range  
304 of the z-scored data. Respiration cycles were defined as the interval from one  
305 inspiration onset to the next inspiration onset. For each participant, respiration cycles  
306 with more than two times the median cycle duration were excluded from further  
307 analysis.

308 For each stimulus-response condition and participant, the mean angle  
309 direction of stimulus onsets within the respiration cycle and their circular variance  
310 across trials were calculated. The distribution of mean angles of each stimulus-  
311 response condition was tested for uniformity with the Rayleigh test. Circular variance  
312 was defined as  $V = 1 - R$ , where  $R$  is the mean resultant length of each stimulus-  
313 response condition and participant with values between 0 and 1. Differences in  
314 circular variances between stimulus-response conditions were assessed with paired  
315  $t$ -tests.

316 Furthermore, we investigated whether participants gradually aligned their  
317 respiration to the stimulus onset in the beginning of the experiment. For the first 30  
318 trials, the difference between each trial's stimulus onset angle and the mean angle  
319 within the first block was determined ("diff\_angle2mean"). The trial angle difference  
320 from the mean was used as a dependent variable in a random-intercept linear  
321 regression based on maximum likelihood estimation with trial number as independent



322 variable: “diff\_angle2mean ~ 1 + trial + (1|participant)”. The fit of this model was  
323 compared with a random-intercept only model “diff\_angle2mean ~ 1 + (1|participant)”  
324 in a  $\chi^2$ -test to assess the effect of trial number on the angle difference. This analysis  
325 included only the 37 participants with a valid first block and excluded trials with false  
326 alarms.

327 Lastly, we compared the respiratory cycle duration between stimulus-  
328 response conditions by performing a one-way repeated-measures ANOVA and post-  
329 hoc *t*-tests.

330

### 331 **Phase-locking analysis between cardiac and respiratory activity**

332 The *n*:*m* ( $n, m \in N$ ) synchronization (Lachaux et al., 1999) was calculated in an inter-  
333 trial setting for the stimulation onset as the following:

$$334 \quad PLV_{cross} = \left| \frac{1}{n} \sum_{i=1}^n e^{j\phi_i} \right|$$

$$335 \quad \phi_i = n \Phi_{i,resp} - m \Phi_{i,ecg}$$

336 where  $\Phi_{i,resp}$  and  $\Phi_{i,ecg}$  were the stimulation onset angles for the *i*-th trial within the  
337 respiratory (*resp*) and cardiac cycle (*ecg*), and *j* was the imaginary number. While  $m =$   
338  $1$  was chosen for all participants, values for *n* were selected by calculating the ratio of  
339 the cardiac and respiratory frequency rounded to the nearest integer. The frequencies  
340 were estimated based on the mean cardiac and respiratory cycle durations at stimulus  
341 onset. The inter-trial *n*:*m* synchronization at stimulation onset can provide information  
342 about the extent to which the weighted phase difference of the two signals stays  
343 identical over trials. The calculated phase-locking value (PLV) lies between zero and  
344 one, with zero indicating no inter-trial coupling and one showing a constant weighted  
345 phase-difference of the two signals at the stimulation time.

346 **Somatosensory evoked potential analysis**

347 For the twelve participants with peripheral nerve recordings, stimulation artefacts  
348 were removed with a cubic monotonous Hermite spline interpolation from -2 s until 4  
349 s relative to the trigger. Next, a 70-Hz high-pass filter was applied (4th order  
350 Butterworth filter applied forwards and backwards) and the data was epoched -100  
351 ms to 100 ms relative to the trigger with -50 ms to -2 ms as baseline correction.  
352 Subsequently, epochs were averaged across for valid trials (yes/no and confidence  
353 response within maximum response time) with near-threshold stimuli and without  
354 stimulations.

## 355 **Results**

### 356 **Detection and confidence responses**

357 Participants ( $N = 41$ ) detected on average 51% of near-threshold stimuli ( $SD = 16\%$ )  
358 and correctly rejected 94% of catch trials without stimulation ( $SD = 6\%$ ). On average,  
359 188 catch trials (range: 93-200) and 375 near-threshold trials (range: 191-400) were  
360 observed. Participants reported to be “confident” about their yes/no-decision in 88%  
361 of the correct rejections ( $SD = 13\%$ ), in 71% of the misses ( $SD = 21\%$ ), and in 62%  
362 of the hits ( $SD = 18\%$ ). The confidence rate differed significantly between all  
363 conditions in paired  $t$ -tests (CR vs. miss:  $p = 3 * 10^{-8}$ ; CR vs. hit:  $p = 1 * 10^{-9}$ ; miss vs.  
364 hit:  $p = 0.019$ ). In total, we observed on average 184 misses (range: 58-303), 192 hits  
365 (range: 59-302), 177 correct rejections (range: 72-198) and 11 false alarms (range: 0-  
366 36). Two-third of the participants (27) had less than ten false alarms and four  
367 participants had zero false alarms. Due to zero or very few observations, false alarms  
368 were not further analyzed.

369 In near-threshold trials, participants reported their yes/no-decision later than  
370 for correct rejections (mean  $\pm$  SD:  $RT_{Hit} = 641 \pm 12$  ms,  $RT_{Miss} = 647 \pm 12$  ms,  $RT_{CR} =$   
371  $594 \pm 10$  ms; paired  $t$ -test hit vs. CR:  $p = 0.02$ , miss vs. CR:  $p = 3 * 10^{-8}$ ). The yes/no-  
372 response times for hits and misses did not differ significantly ( $p = 0.43$ ). Additionally  
373 in unconfident compared to confident near-threshold trials, yes/no-responses were  
374 on average 221 ms slower (mean  $\pm$  SD:  $RT_{Near\_unconf} = 789 \pm 11$  ms,  $RT_{Near\_conf} = 569 \pm 9$   
375 ms; paired  $t$ -test:  $p = 2 * 10^{-16}$ ). Splitting near-threshold trials by confidence resulted  
376 in on average 49 unconfident misses (range: 6-143), 135 confident misses (range: 29-  
377 289), 70 unconfident hits (range: 9-181), and 122 confident hits (range: 24-277).

## 378 Cardiac cycle

379 First, we addressed the question whether stimulus detection differed along the  
380 cardiac cycle. For hits, mean angles within the cardiac cycle were not uniformly  
381 distributed ( $R = 0.34, p = 0.007$ ; Figure 2), indicating a relation between cardiac phase  
382 and stimulus detection. Sixteen participants had a mean angle for hits in the last  
383 quarter of the cardiac cycle (270-360°). The Rayleigh tests were not significant for  
384 misses ( $R = 0.20, p = 0.18$ ) and correct rejections ( $R = 0.05, p = 0.91$ ).

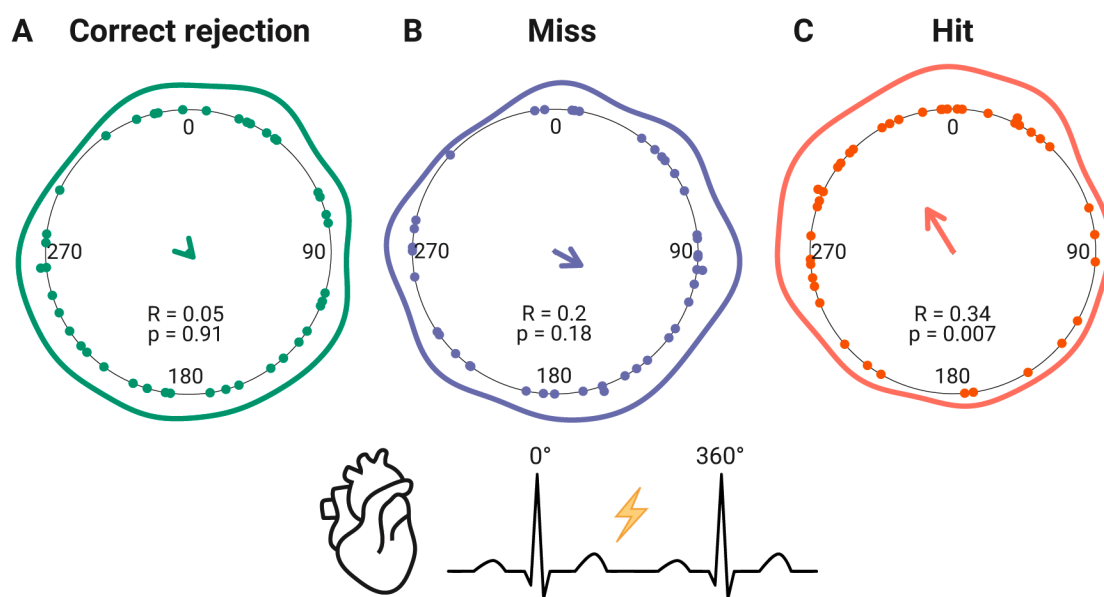

385  
386 **Figure 2.** Distribution of mean angles (stimulus onset relative to cardiac cycle) for (A) correct rejections  
387 (green), (B) misses (purple), and (C) hits (red). Each dot indicates a mean angle by one participant. The  
388 line around the inner circle shows the density distribution of these mean angles. The direction of the  
389 arrow in the center indicates the mean angle across the participants while the arrow length represents  
390 the mean resultant length  $R$ . The resulting  $p$ -value of the Rayleigh test of uniformity is noted below.

391  
392 Second, we repeated the analysis by splitting near-threshold trials based on the  
393 reported decision confidence. The unimodal distribution was also present for  
394 confident hits ( $R = 0.38, p = 0.002$ ) but not for unconfident hits ( $R = 0.10, p = 0.69$ ).  
395 Eighteen participants had a mean angle for confident hits in the last quarter of the

396 cardiac cycle (270-360°). Confident misses also showed a unimodal distribution ( $R =$   
397  $0.28$ ,  $p = 0.04$ ). Unconfident misses ( $R = 0.22$ ,  $p = 0.14$ ), confident correct rejections  
398 ( $R = 0.005$ ,  $p = 1.00$ ) and unconfident correct rejections ( $R = 0.01$ ,  $p = 1.00$ ) did not  
399 allow to reject the uniform distribution. Two participants were excluded from the  
400 analysis of unconfident correct rejections due to zero unconfident correct rejections  
401 (mean  $n = 20$ ,  $SD = 22$ , range: 0-88).

402 Third, near-threshold detection was analyzed separately for confident and  
403 unconfident decisions within four time intervals after the R-peak (0-200 ms, 200-400  
404 ms, 400-600 ms, 600-900 ms). First, we calculated a two-way repeated measures  
405 ANOVA with near-threshold detection rate as dependent variable and time interval  
406 and decision confidence as within-participants factors. The ANOVA showed a main  
407 effect between confidence categories ( $F(1,40) = 7.84$ ,  $p = 0.008$ ) and an interaction  
408 effect of time and confidence categories on near-threshold detection ( $F(3,120) = 3.09$ ,  
409  $p = 0.03$ ). Subsequently, post-hoc  $t$ -tests were calculated between confidence  
410 categories for each time interval and between time intervals within each confidence  
411 category (Figure 3). The detection rate was significantly lower for confident compared  
412 to unconfident decisions within the first two time intervals (0-200 ms: FDR-corrected  
413  $p = 0.02$ ; 200-400 ms: FDR-corrected  $p = 0.02$ ). Between time intervals, we only  
414 observed for confident decisions a significant lower detection rate at 200-400 ms  
415 compared to 400-600 ms (FDR-corrected  $p = 0.02$ ) and 600-900 ms (FDR-corrected  
416  $p = 0.02$ ).

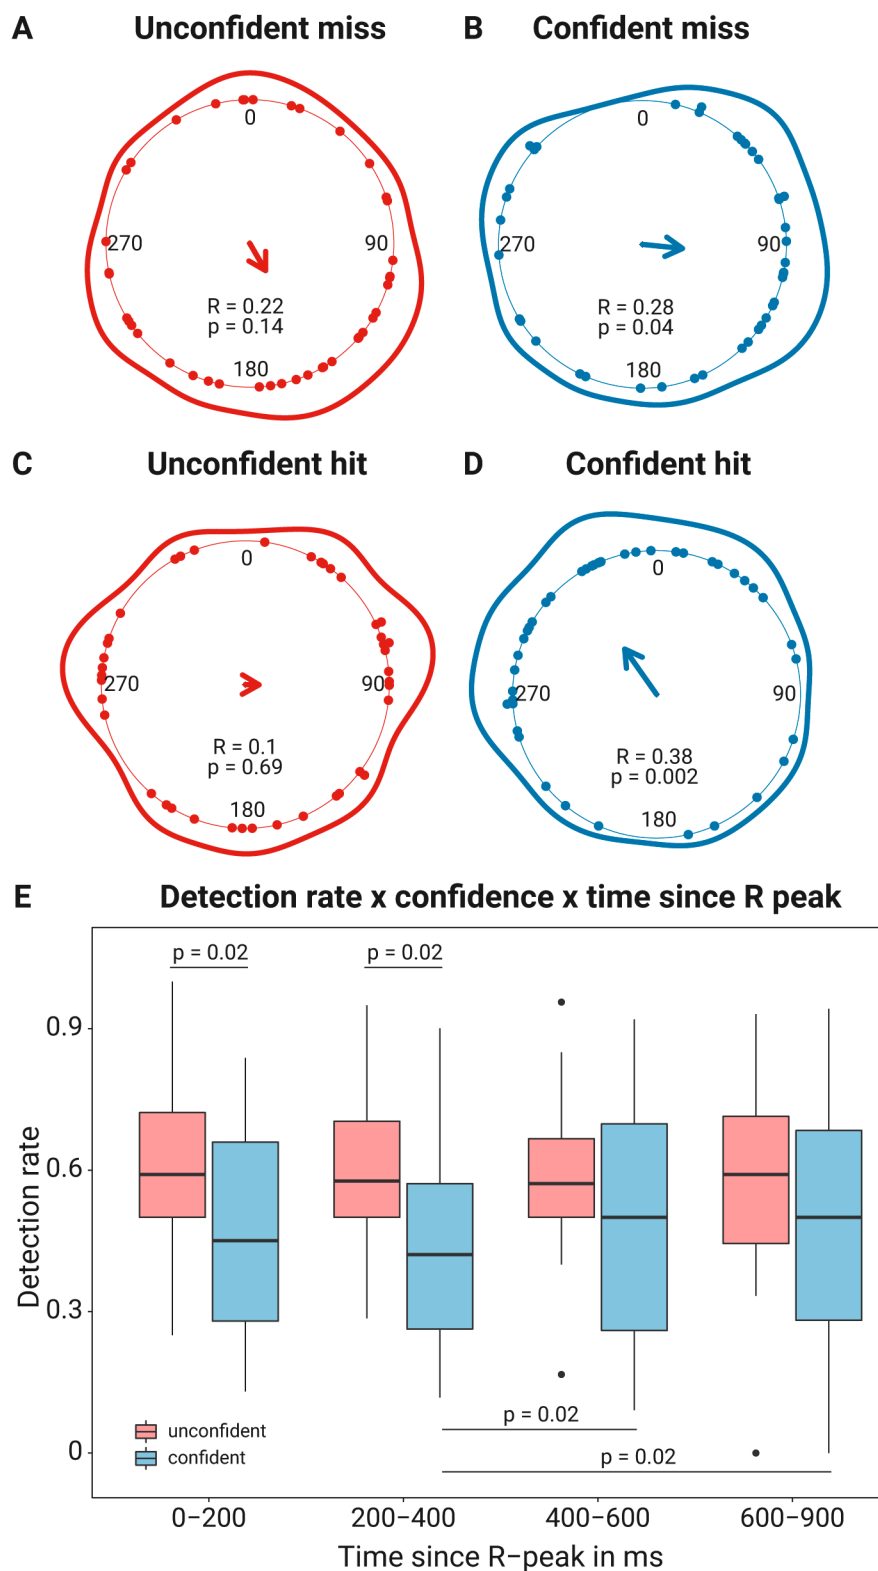

417

418 **Figure 3.** Circular distribution within the cardiac cycle of unconfident/confident misses and hits (**A-D**)

419 and detection rates for unconfident and confident decisions at four time intervals after the R-peak (**E**).

420 The distributions of mean angles (stimulus onset relative to cardiac cycle) are shown for (**A**) unconfident

421 misses (red), (**B**) confident misses (blue), (**C**) unconfident hits (red), and (**D**) confident hits (red). In **A-D**,

422 each dot indicates a mean angle by one participant. The line around the inner circle shows the density  
423 distribution of these mean angles. The direction of the arrow in the center indicates the mean angle  
424 across the participants while the arrow length represents the mean resultant length  $R$ . The resulting  $p$ -  
425 value of the Rayleigh test of uniformity is noted below. **E**, Boxplots show the distribution of detection  
426 rates for unconfident (red) and confident (blue) decisions at four time intervals after the R-peak.  
427 Boxplots indicate the median (centered line), the 25%/75% percentiles (box), 1.5 times the interquartile  
428 range or the maximum value if smaller (whiskers), and outliers (dots beyond the whisker range).  
429 Significant post-hoc  $t$ -tests are indicated with a black bar and the respective FDR-corrected  $p$ -value.

430

### 431 **Cardiac interbeat interval**

432 For each stimulus-response condition (hit, miss, and correct rejection), we extracted  
433 the interbeat interval entailing the stimulus onset, as well as the two preceding and  
434 subsequent interbeat intervals (Figure 4A). We used a two-way repeated measures  
435 ANOVA to test the factors time and stimulus-response condition, and their interaction  
436 on interbeat intervals. The main effect of time ( $F(2.73,109.36) = 35.60, p = 3 \times 10^{-15}$ )  
437 and the interaction of time and stimulus-response condition ( $F(4.89,195.55) = 4.92, p$   
438  $= 0.0003$ ) were significant. There was no significant main effect of stimulus-response  
439 condition on interbeat intervals ( $F(1.42,56.75) = 2.35, p = 0.12$ ). Following, post-hoc  
440  $t$ -tests were calculated at each interbeat interval between the stimulus-response  
441 conditions ( $5 \times 3$ ) and within each stimulus-response condition between subsequent  
442 interbeat intervals ( $3 \times 4$ ), resulting in 27 FDR-corrected  $p$ -values. At “S+1”, the  
443 interbeat intervals (IBI) for hits were significantly longer than for misses ( $\Delta IBI = 5.2$   
444 ms, FDR-corrected  $p = 0.024$ ) and correct rejections ( $\Delta IBI = 4.4$  ms, FDR-corrected  
445  $p = 0.017$ ). The interbeat intervals between misses and correct rejections did not differ  
446 significantly (FDR-corrected  $p = 0.62$ ). At “S+2”, the interbeat intervals for hits were  
447 still longer compared to correct rejections ( $\Delta IBI = 5.3$  ms, FDR-corrected  $p = 0.014$ )

448 but not to misses (FDR-corrected  $p = 0.25$ ). Within each stimulus-response condition  
 449 (hit, miss, and correct rejection) subsequent interbeat intervals differed significantly  
 450 (FDR-corrected  $p < 0.005$ ).

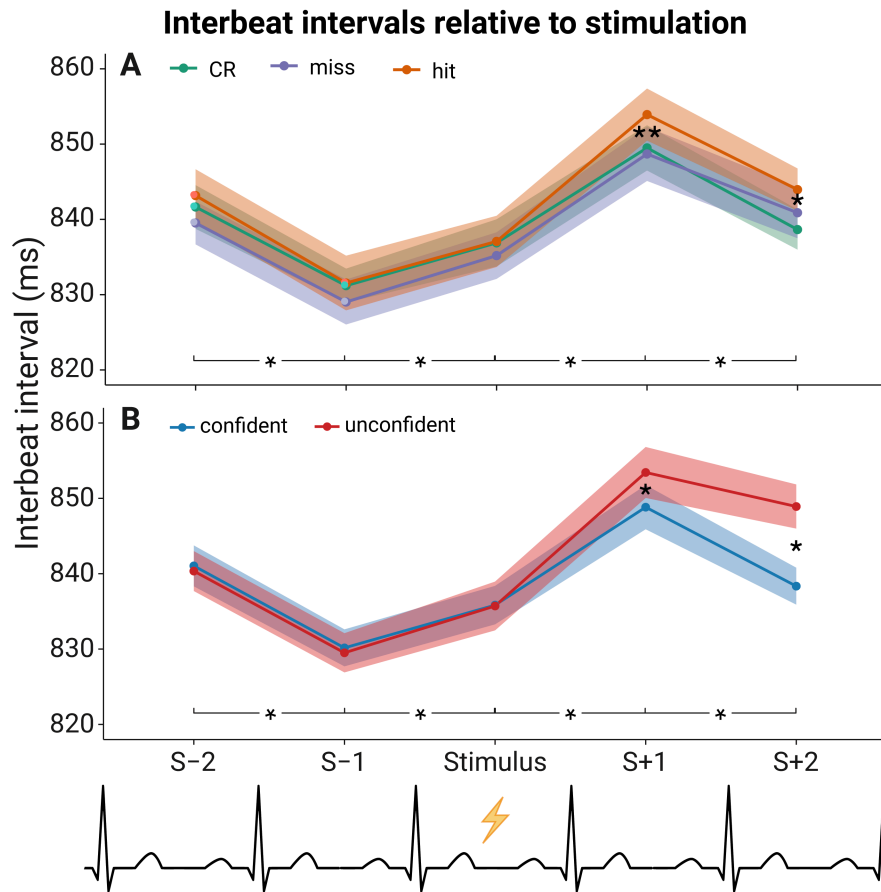

451  
 452 **Figure 4.** Interbeat intervals before and after the stimulus onset for **(A)** correct rejections (green),  
 453 misses (purple), and hits (red), and for **(B)** confident (blue) and unconfident (red) decisions. Confidence  
 454 bands reflect within-participant 95% confidence intervals. The label “Stimulus” on the y-axis indicates  
 455 the cardiac cycle when the stimulation or cue only were present. The labels “S-1” and “S+1” indicate  
 456 the preceding and following intervals respectively. In **A**, the two asterisks “\*\*” at “S+1” indicate  
 457 significant FDR-corrected  $t$ -tests between hits and misses, and between hits and correct rejections.  
 458 The one asterisk “\*” at “S+2” in **A** indicates a significant FDR-corrected  $t$ -test between hits and correct  
 459 rejections. In **B**, the asterisks at “S+1” and “S+2” indicate significant FDR-corrected  $t$ -tests between  
 460 confident and unconfident decisions. The lines with asterisks on the bottom indicate significant FDR-  
 461 corrected  $t$ -tests for subsequent interbeat intervals within all conditions.



462 Furthermore, interbeat intervals of trials with confident and unconfident decisions  
463 independent of stimulus presence and yes/no-response (excluding false alarms) were  
464 compared with a two-way repeated measures ANOVA (Figure 4B). The main effects  
465 time ( $F(2.71, 108.31) = 42.37, p = 2 \times 10^{-16}$ ) and confidence ( $F(1,40) = 5.36, p = 0.026$ ),  
466 as well as the interaction of time and confidence were significant ( $F(2.73, 109.05) =$   
467  $30.79, p = 2 \times 10^{-16}$ ). Post-hoc  $t$ -tests between the two confidence categories for each  
468 interbeat interval (1 x 5) and within each confidence category between subsequent  
469 interbeat intervals (2 x 4) revealed significant longer post-stimulus interbeat intervals  
470 for unconfident compared to confident decisions at “S+1” ( $\Delta IBI = 4.6$  ms, FDR-  
471 corrected  $p = 0.005$ ) and “S+2” ( $\Delta IBI = 10.6$  ms, FDR-corrected  $p = 6 \times 10^{-7}$ ). All  
472 subsequent interbeat intervals differed significantly within each confidence category  
473 (FDR-corrected  $p < 0.05$ ). When repeated for near-threshold trials only, the difference  
474 between confidence categories was still present within each awareness condition:  
475 unconfident hits and misses showed longer interbeat intervals at “S+2” compared to  
476 confident hits ( $\Delta IBI = 5.7$  ms, FDR-corrected  $p = 0.047$ ) and confident misses  
477 respectively ( $\Delta IBI = 10.2$  ms, FDR-corrected  $p = 0.008$ ).

478

#### 479 **Pulse wave relative to electric cardiac cycle**

480 Next to the electric cardiac cycle, we assessed whether stimulus detection was  
481 dependent on the pulse wave cycle measured at the left middle finger. Pulse wave  
482 peaks were located in the cardiac cycle by calculating the time to the preceding R-  
483 peak: the pulse wave transit time (PWTT) and the PWTT relative to its current cardiac  
484 cycle in degree. The PWTT was on average 405 ms ( $SD = 24$  ms, range: 354-439 ms).  
485 The pulse wave peak occurred on average in the middle of the cardiac cycle (mean

486 angle  $M_{PWTT} = 178^\circ$ ,  $R = 0.91$ ,  $p = 0$ ) after the mean angle of confident misses ( $M_{\text{Confident miss}} = 96^\circ$ ) and before the mean angle of confident hits ( $M_{\text{Confident hit}} = 325^\circ$ ).

488 For putting the observed correlations between detection and the cardiac cycle  
489 in relation to the pulse wave peak, the analysis of near-threshold hit rates during  
490 different stimulus onset intervals after the R-peak was repeated limited to 0-400 ms  
491 with shorter intervals (50 ms) and without splitting by confidence. A one-way  
492 repeated-measures ANOVA showed a main effect by time interval on near-threshold  
493 detection rate ( $F(5.64, 225.46) = 3.15$ ,  $p = 0.007$ ). The near-threshold hit rates were  
494 significantly decreased before the pulse wave peak (mean PWTT = 405 ms) during  
495 the interval of 250-300 ms compared to the interval of 0-50 ms (FDR-corrected  $p =$   
496 0.038). The interval 250-300 ms was plotted on the average pulse wave locked to the  
497 preceding R-peak and its slope (difference between adjacent samples). It shows that  
498 after 250 ms the pulse wave substantially increases (Figure 5B).

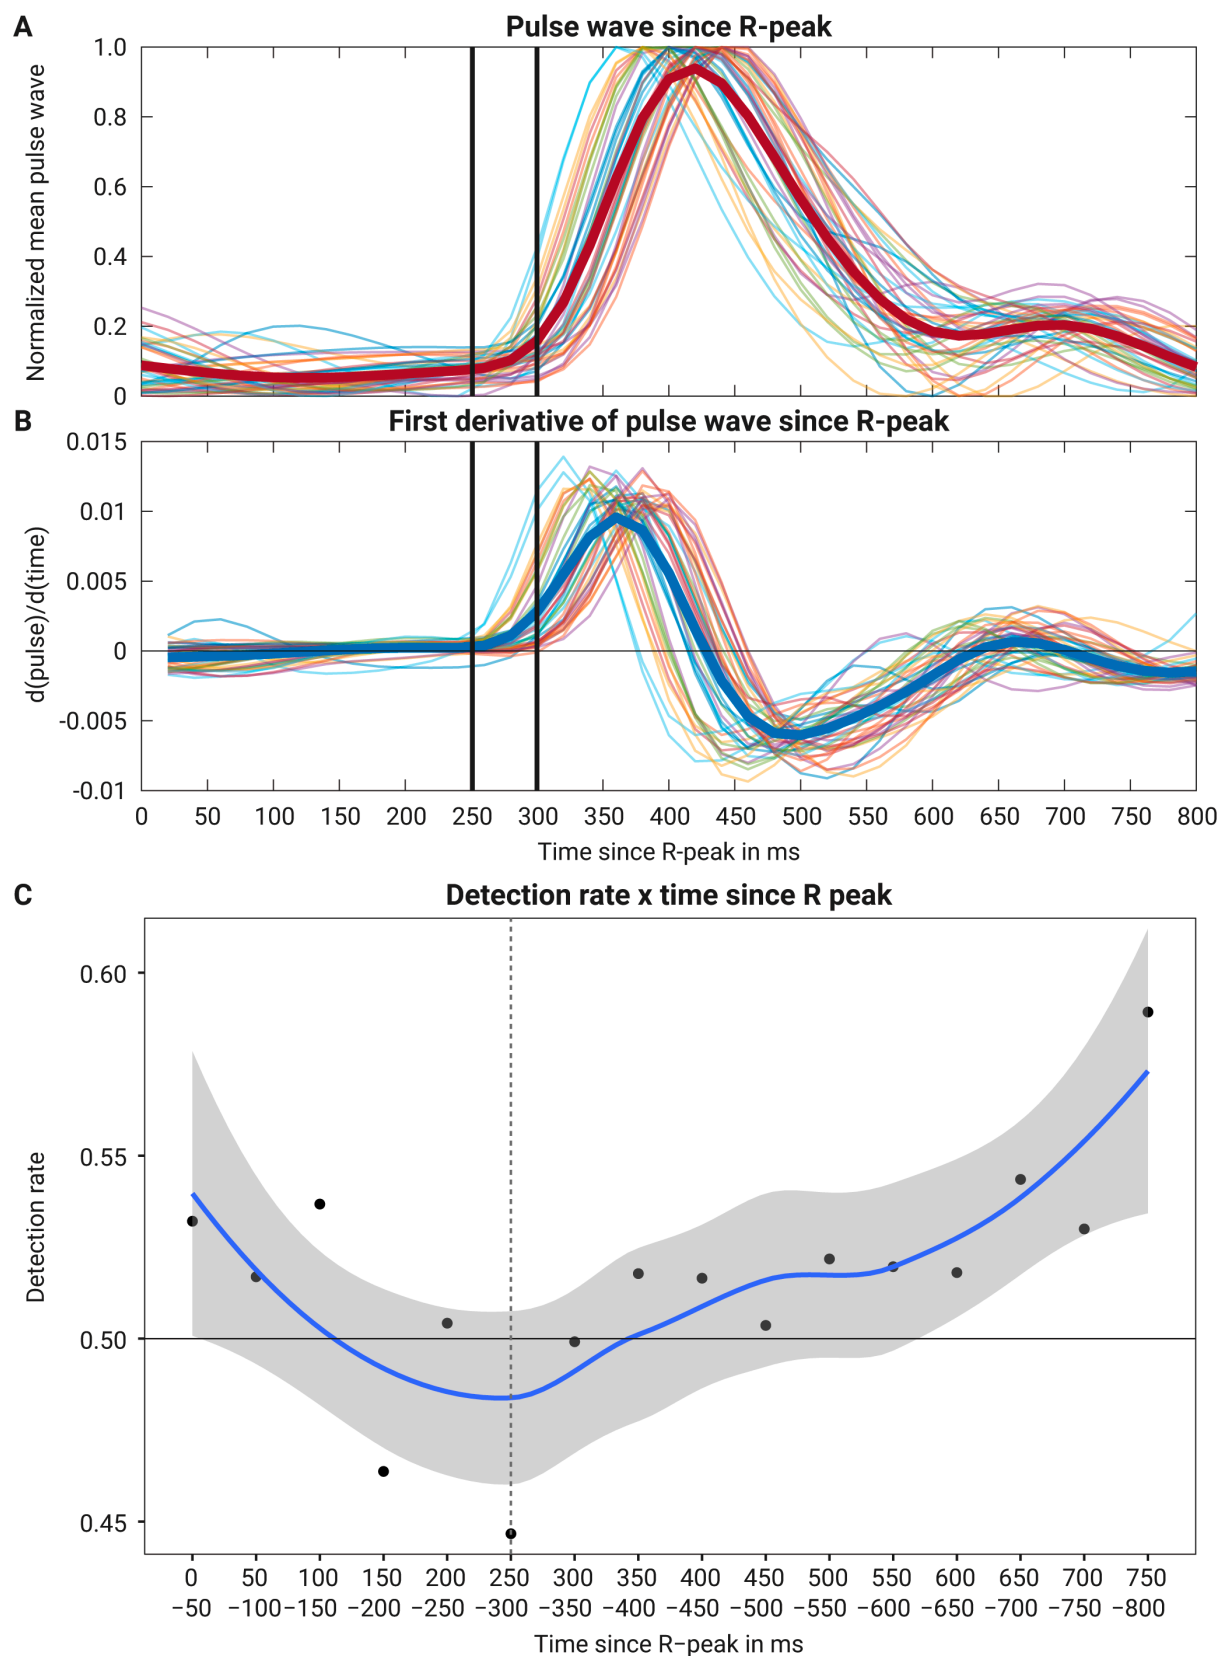

499

500 **Figure 5.** Pulse wave and detection relative to cardiac cycle. **(A)** Mean pulse wave measured at the  
501 left middle finger for each participant locked to preceding R-peak. **(B)** First derivative of the mean pulse  
502 wave. **(C)** Detection rate of near-threshold trials in 50-ms stimulus onset intervals since preceding R-

503 peak. The black dots indicate the mean across participants. The blue line is the locally smoothed loess  
504 curve with a 95% confidence interval (grey) across these means.

505

## 506 **Respiratory cycle**

507 First, we investigated whether conscious tactile perception depends on the stimulus  
508 onset relative to the respiratory cycle. Thus, we calculated the mean angles for hits,  
509 misses, and correct rejections for each participant and tested their circular  
510 distribution with the Rayleigh test of uniformity. For all conditions, uniformity was  
511 rejected in favor of an alternative unimodal distribution (correct rejections:  $R = 0.58$ ,  
512  $p = 4 \times 10^{-7}$ ; misses:  $R = 0.54$ ,  $p = 2 \times 10^{-6}$ ; hits:  $R = 0.65$ ,  $p = 1 \times 10^{-8}$ ; Figure 6). These  
513 unimodal distributions were centered at stimulus onset for the three conditions (mean  
514 angle  $M_{\text{correct rejection}} = 3.2^\circ$ ,  $M_{\text{miss}} = 5.0^\circ$ , and  $M_{\text{hit}} = 15.1^\circ$ ). To assess whether the strength  
515 of the inhale onset locking differed significantly between hits, misses, and correction  
516 rejections, the circular variance of stimulus onset angles across trials was calculated  
517 for each stimulus-response condition and compared with  $t$ -tests. Hits had a lower  
518 circular variance than misses ( $\Delta V = -0.044$ ,  $t(40) = -3.17$ ,  $p = 0.003$ ) and correct  
519 rejections ( $\Delta V = -0.035$ ,  $t(40) = -2.78$ ,  $p = 0.008$ ), i.e., exhibited a stronger clustering  
520 around the mean direction . There was no significant difference in circular variance  
521 between misses and correct rejections ( $p = 0.44$ ). Additionally, we investigated  
522 whether the detection rate of near-threshold trials varied across the cardiac cycle.  
523 For this purpose, near-threshold trials were assigned to four subsequent 1-s time  
524 intervals relative to the preceding inhale onset (0-4 s). A one-way repeated-measures  
525 ANOVA could not establish an effect by time interval on near-threshold detection rate  
526 ( $F(1.81, 72.30) = 0.83$ ,  $p = 0.43$ ).

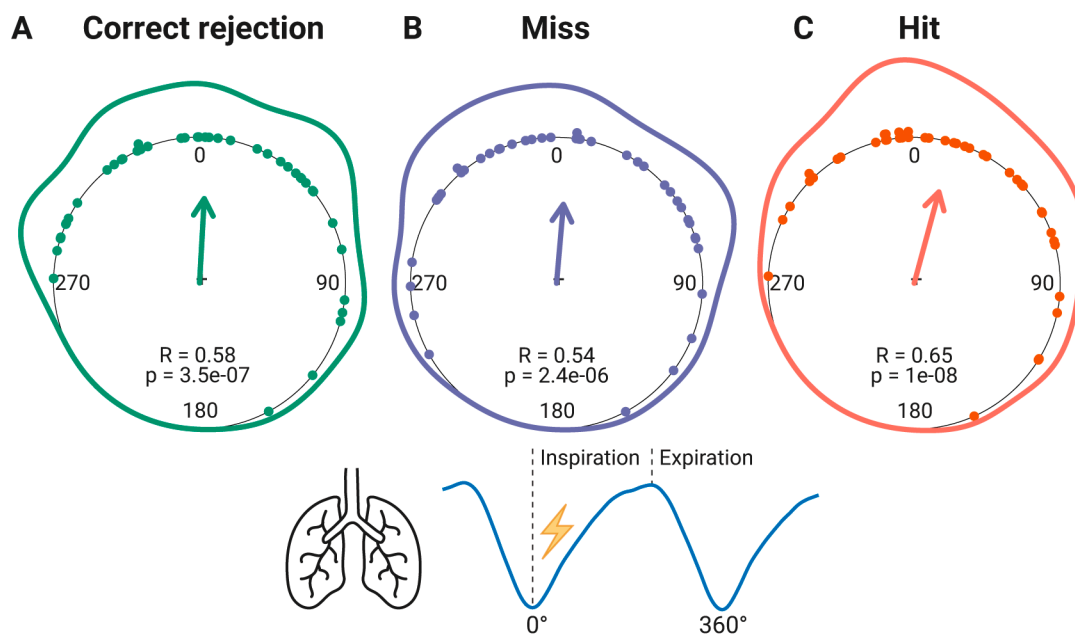

527

528 **Figure 6.** Circular distribution of mean stimulus onsets relative to the respiratory cycle for **(A)** correct  
 529 rejections (green), **(B)** misses (purple), and **(C)** hits (red). Zero degree indicates the inspiration onset.  
 530 Each dot indicates a mean angle by one participant. The line around the inner circle shows the density  
 531 distribution of these mean angles. The direction of the arrow in the center indicates the mean angle  
 532 across the participants while the arrow length represents the mean resultant length  $R$ . The resulting  $p$ -  
 533 value of the Rayleigh test of uniformity is noted below.

534

535 Second, the distribution of mean angles was assessed for confident and  
 536 unconfident decisions. Hits, misses, and correct rejections were split by decision  
 537 confidence and the resulting distributions were evaluated with the Rayleigh test for  
 538 uniformity. All stimulus-response conditions showed for unconfident and confident  
 539 decisions a significant unimodal distribution locked around the stimulus onset:  
 540 unconfident correct rejections (mean angle  $M_{\text{unconf\_CR}} = 18.3^\circ$ ;  $R = 0.41$ ,  $p = 0.001$ ),  
 541 confident correct rejections ( $M_{\text{conf\_CR}} = 2.2^\circ$ ;  $R = 0.58$ ,  $p = 4 \times 10^{-7}$ ), unconfident misses  
 542 ( $M_{\text{unconf\_miss}} = 13.4^\circ$ ;  $R = 0.45$ ,  $p = 0.0001$ ), confident misses ( $M_{\text{conf\_miss}} = 6.7^\circ$ ,  $R = 0.51$ ;  
 543  $p = 0.00001$ ), unconfident hits ( $M_{\text{unconf\_hit}} = 10.4^\circ$ ;  $R = 0.51$ ,  $p = 0.0001$ ), and confident

544 hits ( $M_{\text{conf\_hit}} = 15.2^\circ$ ;  $R = 0.67$ ,  $p = 4 \times 10^{-9}$ ). Two participants had zero unconfident  
545 correct rejections and were not considered in the respective Rayleigh test.

546 Third, in order to examine aforementioned phase effects further, we  
547 investigated whether participants adjusted their respiration rhythm to the paradigm  
548 in the beginning of the experiment. Thus for the first 30 trials of the first block, a  
549 random-intercept linear regression model with maximum likelihood estimation (lmer  
550 function in R) was calculated to evaluate the effect of trial number on trial angle  
551 difference from the mean for each participant. The angle difference was determined  
552 between the stimulus onset angle within the respiratory cycle of each trial and the  
553 mean of all angles in the first block (“diff\_angle2mean”). This analysis included 37  
554 participants with a first block and excluded trials with false alarms. Comparing the  
555 model “diff\_angle2mean ~ 1 + trial + (1|participant)” with a random intercept-only  
556 model “diff\_angle2mean ~ 1 + (1|participant)” revealed an effect of trial on the  
557 difference to the angle mean within the first 30 trials of the first block ( $\chi^2 = 5.84$ ,  $p =$   
558  $0.016$ ). The fixed-effect slope was  $b_1 = -0.47$  and the mean of the random-intercepts  
559  $b_0 = 79.7$  ( $\text{diff\_angle2mean} = b_1 * \text{trial} + b_0$ ).

560

### 561 **Respiratory cycle duration**

562 Given the previously reported heart slowing during conscious tactile perception  
563 (Motyka et al., 2019)., we tested whether a similar effect was also present in the  
564 respiratory rhythm. Indeed, the mean duration of respiratory cycles differed between  
565 response categories (Figure 7), as indicated by a one-way repeated-measures  
566 ANOVA ( $F(1.49, 59.61) = 13.11$ ,  $p = 0.0001$ ). Post-hoc  $t$ -tests showed that respiratory  
567 cycles accompanying misses (mean  $t = 3.86$  s) were significantly longer than

568 respiratory cycles with correct rejections (mean  $t = 3.82$  s,  $\Delta t = 40$  ms, FDR-corrected  
569  $p = 0.002$ ) and with hits (mean  $t = 3.77$  s,  $\Delta t = 91$  ms, FDR-corrected  $p = 0.0002$ ).  
570 Respiratory cycles with hits were also significantly shorter than correct rejections ( $\Delta t$   
571  $= 50$  ms, FDR-corrected  $p = 0.014$ ).

572 Additionally, we analyzed whether the respiratory cycle duration differed  
573 between confident and unconfident hits and misses. There was a main effect by  
574 detection ( $F(1, 40) = 14.64$ ,  $p = 0.0004$ ) but not by confidence ( $F(1, 40) = 1.15$ ,  $p =$   
575  $0.29$ ) on respiratory cycle duration in a two-way repeated measures ANOVA. The  
576 interaction of detection and confidence was not significant ( $F(1, 40) = 0.83$ ,  $p = 0.37$ ).

**Mean respiratory cycle duration**

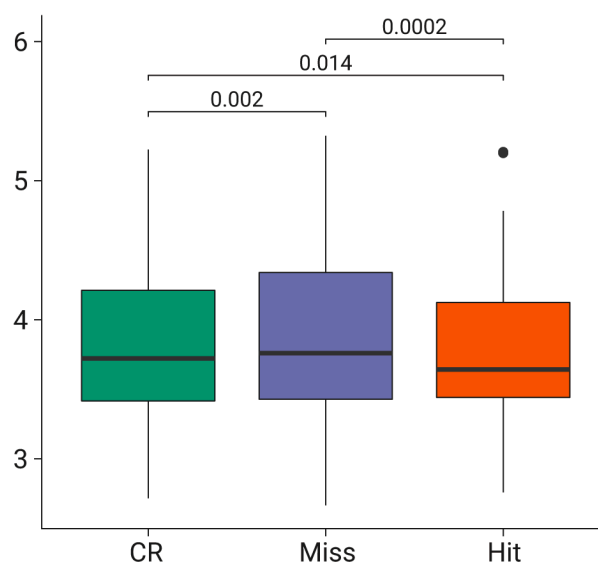

577  
578 **Figure 7.** Mean respiratory cycle duration in seconds for correct rejections (green), misses (purple),  
579 and hits (red). The boxplots indicate the median (centered line), the 25%/75% percentiles (box), 1.5  
580 times the interquartile range or the maximum value if smaller (whiskers), and outliers (dots beyond the  
581 whisker range). Significant post-hoc  $t$ -tests are indicated above the boxplot with a black bar and the  
582 respective FDR-corrected  $p$ -value.

### 583 **Phase-locking between cardiac and respiratory activity**

584 Due to the natural coupling of cardiac and respiratory rhythms (Dick et al., 2014), we  
585 investigated whether phase-locking of both rhythms is associated with conscious  
586 tactile perception. Phase-locking values (PLVs) were calculated across trials using  
587 n:m synchronization (Tass et al., 1998; Lachaux et al., 1999) to account for the  
588 different frequency bands of the two signals. PLVs were compared between hits,  
589 misses, and correct rejections with a one-way repeated-measures ANOVA. The  
590 ANOVA showed no significant main effect of stimulus-response condition on PLVs  
591 between cardiac and respiratory activity ( $F(1.98,79.15) = 1.72, p = 0.19$ ).

592

### 593 **Peripheral nerve activity**

594 For the sub-sample of twelve participants with peripheral nerve recordings at the left  
595 upper arm, there was no somatosensory evoked potential associated with near-  
596 threshold stimuli. Also, the grand mean across participants did not show a difference  
597 between trials with and without near-threshold stimulation. We concluded that near-  
598 threshold stimulation intensities (in the given sub-sample on average 1.88 mA, range:  
599 0.79-2.50 mA) did not produce sufficiently high peripheral somatosensory evoked  
600 potentials to measure them non-invasively from the inner side of the upper arm.  
601 Hence, we did not further pursue the analysis of peripheral somatosensory evoked  
602 potentials. (Yet note that peripheral somatosensory evoked potentials were observed  
603 in a pilot study with the same acquisition setup but applying super-threshold  
604 stimulation intensities of 6 mA.)



## 605 **Discussion**

606 In a tactile detection paradigm with near-threshold electrical finger nerve stimulation,  
607 cardiac and respiratory activity was observed with electrocardiography (ECG), pulse  
608 oximetry, and a respiration chest belt. The present study is the third independent  
609 study, where we observed a cardiac cycle effect on tactile detection (hits more likely  
610 during diastole) and a pronounced heart slowing with conscious tactile perception  
611 (Motyka et al., 2019; Al et al., 2020). The previously reported lower tactile detection  
612 during systole (Al et al., 2020) and the unimodal distribution of hits in diastole (Motyka  
613 et al., 2019; Al et al., 2020) were both only present when decision confidence was  
614 high. Using finger pulse oximetry, we identified that the lowest tactile detection rate  
615 between 250 and 300 ms after the R-peak corresponded to the pulse wave onset.  
616 We furthermore showed that the respiration rhythm adapted to the tactile detection  
617 paradigm, such that inhale onsets tended to be locked to expected stimulus onsets.  
618 This locking of inhale onsets to stimulus onset was more consistent for detected  
619 compared to undetected near-threshold trials. Respiratory cycles accompanying  
620 misses were longer in comparison to hits and correct rejections.

621

### 622 **Detection varies across the cardiac cycle only for confident decisions**

623 Relating tactile detection to cardiac activity revealed that hits were not uniformly  
624 distributed across the cardiac cycle and more likely to appear in the last quarter, as  
625 we have shown previously (Motyka et al., 2019; Al et al., 2020). Splitting hits and  
626 misses by decision confidence - not possible in our previous studies - showed that  
627 this unimodal distribution was only present for confident but not unconfident hits.

628 Additionally, also confident but not unconfident misses showed a unimodal  
629 distribution (centered around 90 degrees).

630         When we analyzed the near-threshold detection rate for four stimulus onset  
631 intervals relative to the preceding R-peak split by decision confidence, we observed  
632 that detection was lower when the decision was confident. Furthermore, only  
633 confident hits were reduced in the second time interval (200-400 ms) compared to  
634 the two later timer intervals (400-900 ms). In our previous study (Al et al., 2020), a  
635 decreased detection rate was observed for the very same time interval.

636         While replicating the unimodal distribution of hits within the cardiac cycle here  
637 for the third time in an independent study of somatosensory detection (Motyka et al.,  
638 2019; Al et al., 2020), the explanation for this effect still stays speculative. It seems  
639 highly plausible that the decreased detection rate between 200 and 400 ms after the  
640 R-peak is related to the arrival of the pulse wave in the finger at circa 250 ms or  
641 heartbeat sensations (see below discussion on *Pulse wave*). Our finding that the  
642 number of confident hits is reduced (in contrast to unconfident ratings) seems  
643 consistent with a “late” event in the perceptual decision-making process. This is in  
644 line with our previous EEG study which has shown that only late cortical  
645 somatosensory evoked potentials (P300) are increased for stimuli during diastole  
646 compared to systole (Al et al., 2020). Hence, both, the reduction of confident hits and  
647 the modulation of (only) late SEP-components, speak for higher cognitive processes  
648 as meta-cognition or prediction to be involved in the cardiac cycle effect on  
649 conscious tactile perception.

650 **Pulse wave onset marks decreased detection in cardiac cycle**

651 Addressing the hypothesis whether decreased near-threshold detection 200-400 ms  
652 after the R-peak was caused by the pulse wave peak in the finger (Al et al., 2020),  
653 pulse wave peaks were located in the cardiac cycle. As a result, the decreased near-  
654 threshold detection rate was located more precisely 250-300 ms after the R-peak,  
655 before the pulse wave peak (405 ms) in the middle of the cardiac cycle (178°).  
656 Inspecting the slope of the pulse wave showed a take-off around 250 ms after the  
657 preceding R-peak, indicating the pulse wave onset.

658         If a suppressive top-down mechanism for pulse wave related changes in the  
659 finger affects near-threshold tactile detection, then it might be already sensitive to  
660 initial changes of the pulse wave in the finger than only to its peak (Macefield, 2003).  
661 Perception of heartbeats has been reported to occur in the very same time interval of  
662 200-300 ms after the R-peak (Yates et al., 1985; Brener and Kluitse, 1988; Ring and  
663 Brener, 1992). While this temporal judgement is unlikely to be solely based on the  
664 pulse wave in the finger - heartbeat sensations were mainly localized on the chest  
665 (Khalsa et al., 2009; Hassanpour et al., 2016), it might be possible that the prediction  
666 of strongest heartbeat-related changes at 250-300 ms attenuated the detection of  
667 weak stimuli presented in the same time window. Temporally locating the lower tactile  
668 detection during systole at the pulse wave onset in the finger provides further  
669 evidence for the view that the cardiac cycle effect does not correspond to maximal  
670 peripheral cardiac changes. It rather suggests that this is a conflict on the perceptual  
671 level during an interval with the highest uncertainty whether a weak pulse was  
672 generated internally (heartbeat) or applied externally (Allen et al., n.d.).

### 673 **Heart slowing with conscious perception and unconfident decisions**

674 In the present study, previously reported heart slowing with conscious perception  
675 (Park et al., 2014; Cobos et al., 2019; Motyka et al., 2019) was replicated and in  
676 addition to it observed to be enhanced for unconfident decisions. Greater heart  
677 slowing for unconfident decisions suggests the involvement of another mechanism  
678 determining heart rate deceleration compared to the unimodal distribution of hits in  
679 diastole which was absent for unconfident hits. Increased heart slowing for  
680 unconfident decisions might be associated with uncertainty, because heart slowing  
681 has been reported for the violation of performance-based expectations in a learning  
682 paradigm (Crone et al., 2003), for errors in a visual discrimination task (Łukowska et  
683 al., 2018), and for error keystrokes by pianists (Bury et al., 2019).

684

### 685 **Inspiration locking to stimulus onsets**

686 Localizing stimulus onsets in the respiratory cycle revealed that inspiration onsets  
687 locked at the expected stimulus onset independent of stimulus presence, detection,  
688 and decision confidence. Circular variance was lower for hits than misses, indicating  
689 a more pronounced locking went along with a higher likelihood of hits. For the first  
690 thirty trials, the difference to the mean angle of the first block showed a linear  
691 decrease, suggesting that participants adapted their respiration rhythm to the  
692 paradigm in the beginning. Respiratory cycles accompanying misses had a significant  
693 longer duration than hits.

694 These observations support the notion that inspiration is tuning the sensory  
695 system for incoming information (Perl et al., 2019). Recently, it has been shown that  
696 inhale onsets were locked to different cognitive task onsets, which increased task-

697 specific brain activity and performance in a visuospatial perception task (Perl et al.,  
698 2019). Neural activity in piriform cortex, amygdala, and hippocampus synchronized  
699 with respiration and had its oscillatory power peak during nasal inspiration, when  
700 fearful face detection was faster, and memory encoding and retrieval was enhanced  
701 compared to expiration (Zelano et al., 2016). While we also observed locking of inhale  
702 onsets to our detection task and pronouncedly to stimulus detection, future studies  
703 could investigate whether this respiratory pattern also drives the brain activity into an  
704 optimal state for conscious tactile perception. For the visuospatial perception task by  
705 Perl et al. (2019), decreased alpha power has been observed in postcentral and  
706 parahippocampal gyrus during inspiration compared to expiration. Analogously,  
707 lower pre-stimulus alpha power in central brain areas (Mu rhythm) has been  
708 associated with higher neural excitability reflected in improved conscious tactile  
709 perception (Schubert et al., 2009; Nierhaus et al., 2015; Craddock et al., 2017;  
710 Forschack et al., 2020; Stephani et al., 2021).

711         Meanwhile, it is unclear whether longer respiratory cycles for misses in our  
712 study are a result of less pronounced inspiration locking or a consequence of missing  
713 the stimulus. Future studies with longer interstimulus intervals would be able to  
714 dissect whether the respiratory cycle duration is a determinant or consequence of  
715 undetected near-threshold trials. For now, we can state that participants adapted  
716 their respiratory rhythm to the paradigm and showed this more consistently in  
717 detected near-threshold trials.

718 **Conclusion**

719 We show that the two predominant body rhythms differentially modulate conscious  
720 tactile perception. Cardiac cycle effects seem to be grounded on higher cognitive  
721 processes compatible with an interoceptive predictive coding account. Phase locking  
722 of respiration seems to facilitate conscious tactile perception by tuning the inspiration  
723 phase to optimize detection task performance.

## 724 **References**

- 725 Al E, Iliopoulos F, Forschack N, Nierhaus T, Grund M, Motyka P, Gaebler M, Nikulin  
726 VV, Villringer A (2020) Heart-brain interactions shape somatosensory perception  
727 and evoked potentials. *Proc Natl Acad Sci USA* 7:201915629.
- 728 Allen M, Levy A, Parr T, Friston, K (2019) In the body's eye: the computational  
729 anatomy of interoceptive inference. *bioRxiv* 603928. doi: 10.1101/603928
- 730 Azzalini D, Rebollo I, Tallon-Baudry C (2019) Visceral Signals Shape Brain Dynamics  
731 and Cognition. *Trends Cogn Sci* 23:488–509.
- 732 Babo-Rebelo M, Richter CG, Tallon-Baudry C (2016) Neural Responses to  
733 Heartbeats in the Default Network Encode the Self in Spontaneous Thoughts. *J*  
734 *Neurosci* 36:7829–7840.
- 735 Benjamini Y, Hochberg Y (1995) Controlling the False Discovery Rate: A Practical  
736 and Powerful Approach to Multiple Testing. Royal Statistical Society, Series B  
737 *Methodological* 57:289–300
- 738 Brener J, Kluitse C (1988) Heartbeat detection: judgments of the simultaneity of  
739 external stimuli and heartbeats. *Psychophysiology* 25:554–561.
- 740 Bury G, García-Huésca M, Bhattacharya J, Ruiz MH (2019) Cardiac afferent activity  
741 modulates early neural signature of error detection during skilled performance.  
742 *NeuroImage* 199:704–717.
- 743 Cobos MI, Guerra PM, Vila J, Chica AB (2019) Heart-rate modulations reveal  
744 attention and consciousness interactions. *Psychophysiology* 56:e13295.
- 745 Craddock M, Poliakoff E, El-dereby W, Klepousniotou E, Lloyd DM (2017) Pre-  
746 stimulus alpha oscillations over somatosensory cortex predict tactile  
747 misperceptions. *Neuropsychologia* 96:9–18.

- 748 Critchley HD, Garfinkel SN (2015) Interactions between visceral afferent signaling  
749 and stimulus processing. *Front Neurosci* 9:305–309.
- 750 Critchley HD, Harrison NA (2013) Visceral influences on brain and behavior. *Neuron*  
751 77:624–638.
- 752 Crone EA, van der Veen FM, van der Molen MW, Somsen RJM, van Beek B,  
753 Jennings JR (2003) Cardiac concomitants of feedback processing. *Biological*  
754 *Psychology* 64:143–156.
- 755 Dick TE, Hsieh Y-H, Dhingra RR, Baekey DM, Galán RF, Wehrwein E, Morris KF  
756 (2014) Cardiorespiratory coupling: common rhythms in cardiac, sympathetic,  
757 and respiratory activities. *Prog Brain Res* 209:191–205.
- 758 Forschack N, Nierhaus T, Müller MM, Villringer A (2020) Dissociable neural  
759 correlates of stimulation intensity and detection in somatosensation.  
760 *NeuroImage*:116908.
- 761 Galvez-Pol A, McConnell R, Kilner JM (2020) Active sampling in visual search is  
762 coupled to the cardiac cycle. *Cognition* 196:104149.
- 763 Hassanpour MS, Yan L, Wang DJJ, Lapidus RC, Arevian AC, Simmons WK,  
764 Feusner JD, Khalsa SS (2016) How the heart speaks to the brain: neural activity  
765 during cardiorespiratory interoceptive stimulation. *Phil Trans R Soc Lond B* 371.
- 766 Huijbers W, Pennartz CMA, Beldzik E, Domagalik A, Vinck M, Hofman WF, Cabeza  
767 R, Daselaar SM (2014) Respiration phase-locks to fast stimulus presentations:  
768 implications for the interpretation of posterior midline "deactivations". *Hum*  
769 *Brain Mapp* 35:4932–4943.
- 770 Khalsa SS, Rudrauf D, Feinstein JS, Tranel D (2009) The pathways of interoceptive  
771 awareness. *Nat Neurosci* 12:1494–1496.



- 772 Kingdom FAA, Prins N (2009) Psychophysics. London: Academic Press Inc.
- 773 Kleiner M, Brainard D, Pelli D, Ingling A, Murray R, Broussard C (2007) What's new  
774 in psyctoolbox-3. *Perception* 36:1–16.
- 775 Kralemann B, Frühwirth M, Pikovsky A, Rosenblum M, Kenner T, Schaefer J, Moser  
776 M (2013) In vivo cardiac phase response curve elucidates human respiratory  
777 heart rate variability. *Nat Commun* 4:2418–2419.
- 778 Kunzendorf S, Klotzsche F, Akbal M, Villringer A, Ohl S, Gaebler M (2019) Active  
779 information sampling varies across the cardiac cycle. *Psychophysiology*  
780 56:e13322.
- 781 Lachaux JP, Rodriguez E, Martinerie J, Varela FJ (1999) Measuring phase  
782 synchrony in brain signals. *Hum Brain Mapp* 8:194–208.
- 783 Macefield VG (2003) Cardiovascular and respiratory modulation of tactile afferents  
784 in the human finger pad. *Exp Physiol* 88:617–625.
- 785 Motyka P, Grund M, Forschack N, Al E, Villringer A, Gaebler M (2019) Interactions  
786 between cardiac activity and conscious somatosensory perception.  
787 *Psychophysiology* 56:469–13.
- 788 Nierhaus T, Forschack N, Piper SK, Holtze S, Krause T, Taskin B, Long X, Stelzer J,  
789 Margulies DS, Steinbrink J, Villringer A (2015) Imperceptible somatosensory  
790 stimulation alters sensorimotor background rhythm and connectivity. *J Neurosci*  
791 35:5917–5925.
- 792 Ohl S, Wohltat C, Kliegl R, Pollatos O, Engbert R (2016) Microsaccades Are  
793 Coupled to Heartbeat. *J Neurosci* 36:1237–1241.
- 794 Oldfield RC (1971) The assessment and analysis of handedness: the Edinburgh  
795 inventory. *Neuropsychologia* 9:97–113.

- 796 Park H-D, Barnoud C, Trang H, Kannape OA, Schaller K, Blanke O (2020) Breathing  
797 is coupled with voluntary action and the cortical readiness potential. *Nat*  
798 *Commun* 11:289–8.
- 799 Park H-D, Correia S, Ducorps A, Tallon-Baudry C (2014) Spontaneous fluctuations  
800 in neural responses to heartbeats predict visual detection. *Nat Neurosci* 17:612–  
801 618.
- 802 Perl O, Ravia A, Rubinson M, Eisen A, Soroka T, Mor N, Secundo L, Sobel N (2019)  
803 Human non-olfactory cognition phase-locked with inhalation. *Nat Hum Behav*  
804 3:501–512.
- 805 Power JD, Lynch CJ, Dubin MJ, Silver BM, Martin A, Jones RM (2020)  
806 Characteristics of respiratory measures in young adults scanned at rest,  
807 including systematic changes and “missed” deep breaths. *NeuroImage*  
808 204:116234.
- 809 Ring C, Brener J (1992) The temporal locations of heartbeat sensations.  
810 *Psychophysiology* 29:535–545.
- 811 Savitzky A, Golay MJE (1964) Smoothing and differentiation of data by simplified  
812 least squares procedures. *Analytical Chemistry* 36:1627–1639.
- 813 Schubert R, Haufe S, Blankenburg F, Villringer A, Curio G (2009) Now you'll feel it,  
814 now you won't: EEG rhythms predict the effectiveness of perceptual masking. *J*  
815 *Cognitive Neurosci* 21:2407–2419.
- 816 Seth AK, Friston KJ (2016) Active interoceptive inference and the emotional brain.  
817 *Phil Trans R Soc Lond B* 371.

- 818 Stephani T, Hodapp A, Jamshidi Idaji M, Villringer A, Nikulin VV (2021) Neural  
819 excitability and sensory input determine intensity perception with opposing  
820 directions in initial cortical responses. bioRxiv 2020.11.27.401430.  
821 doi:10.1101/2020.11.27.401430
- 822 Tass P, Rosenblum MG, Weule J, Kurths J, Pikovsky A, J V, Schnitzler A, Freund H-  
823 J (1998) Detection of n:m Phase Locking from Noisy Data: Application to  
824 Magnetoencephalography. Phys Rev Lett 81:3291–3294.
- 825 Yates AJ, Jones KE, Marie GV, Hogben JH (1985) Detection of the heartbeat and  
826 events in the cardiac cycle. Psychophysiology 22:561–567.
- 827 Zelano C, Jiang H, Zhou G, Arora N, Schuele S, Rosenow J, Gottfried JA (2016)  
828 Nasal Respiration Entrain Human Limbic Oscillations and Modulates Cognitive  
829 Function. J Neurosci 36:12448–12467.
- 830 Łukowska M, Sznajder M, Wierzchoń M (2018) Error-related cardiac response as  
831 information for visibility judgements. Scientific Reports 8:1131.
